# Supplementary material for: A novel scintillation screen for achieving high-energy ray detection with fast and full-color emission
Source: Royal Society of Chemistry journal article supplement (doi:10.1039/d1tc01318a), 2021-01-01
Supplement: d1tc01318a1.pdf [file d1tc01318a1.pdf]

## Supporting Information

### **A novel scintillation screen for achieving high-energy ray detection with fast and full-color emission**

Heng Yang, ‡<sup>a</sup> Huihui Li, ‡<sup>a</sup> Rui Yuan,<sup>a</sup> Junfeng Chen,<sup>b</sup> Jingtai Zhao,<sup>c</sup> Sheng Wang,<sup>d</sup> Yufeng Liu,<sup>e</sup> Qianli Li,<sup>\*a</sup> Zhijun Zhang,<sup>\*a</sup>

*a. School of Materials Science and Engineering, Shanghai University, Shanghai 200444, China.*

*Email: liqianli@shu.edu.cn, zhangzhijun@shu.edu.cn*

*b. Shanghai Institute of Ceramics, Chinese Academy of Sciences, Shanghai 200050, China.*

*c. School of Materials Science and Engineering, Guilin University of Electronic Technology,  
Guilin 541004, China.*

*d. Key Laboratory of Advanced Display and System Applications of Ministry of Education,  
Shanghai University, Shanghai 200072, China.*

*e. School of Materials Science and Engineering, Shanghai Institute of Technology, Shanghai  
200235, China*

*‡ These authors contributed equally.*

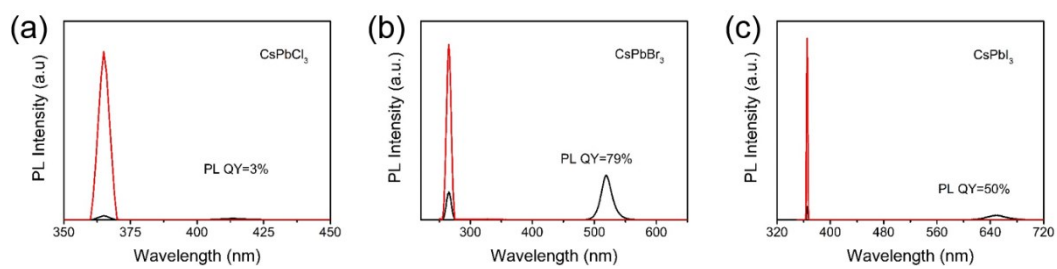

**Fig. S1** PL QY graphs of a) CsPbCl<sub>3</sub>, 3%; b) CsPbBr<sub>3</sub>, 79%; c) CsPbI<sub>3</sub>, 50%.

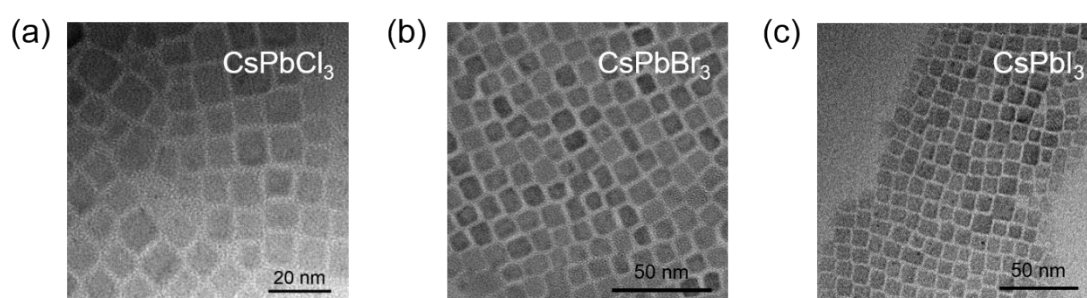

**Fig. S2** TEM images of a) CsPbCl<sub>3</sub>; b) CsPbBr<sub>3</sub>; c) CsPbI<sub>3</sub>.

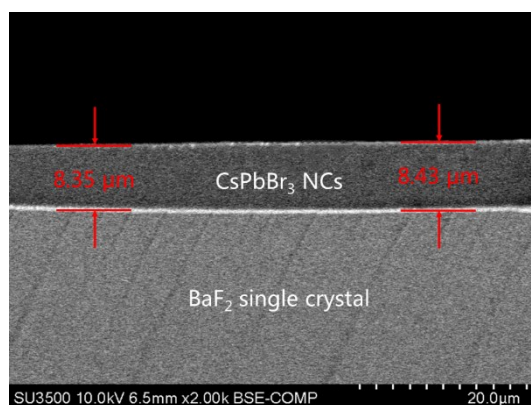

**Fig. S3** The cross-sectional view SEM image of CsPbBr<sub>3</sub> NCs@BaF<sub>2</sub> scintillation screen.

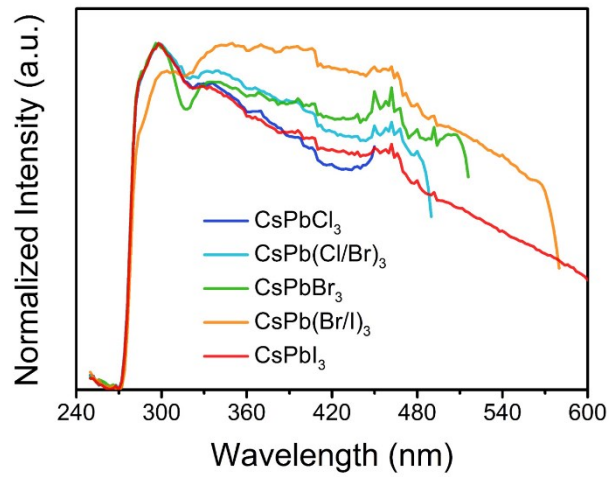

**Fig. S4** PLE spectra of CsPbX<sub>3</sub> nanocrystals.

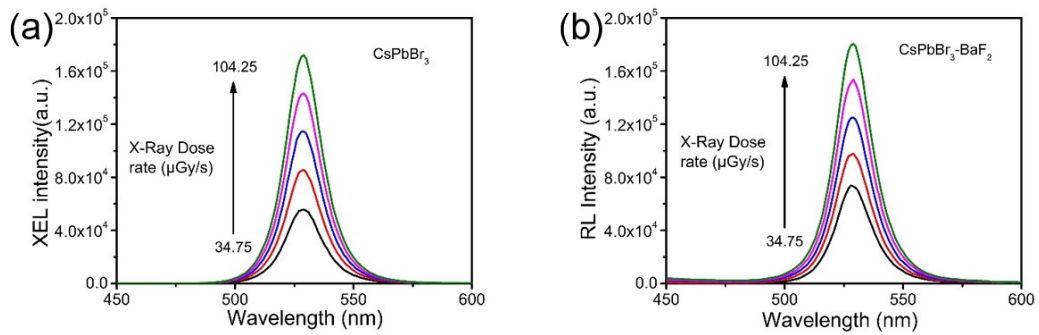

**Fig. S5** XEL spectra of (a) CsPbX<sub>3</sub> film and (b) CsPbX<sub>3</sub> -BaF<sub>2</sub> films under X-ray with different dose rates.

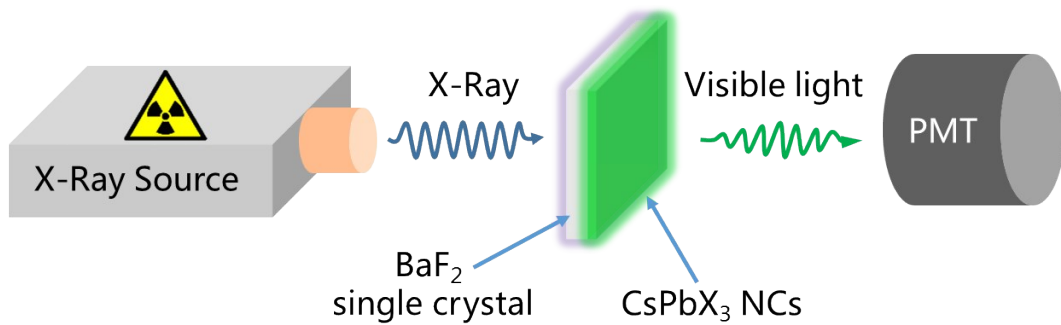

**Fig.S6** The light path diagram of XEL measurement.

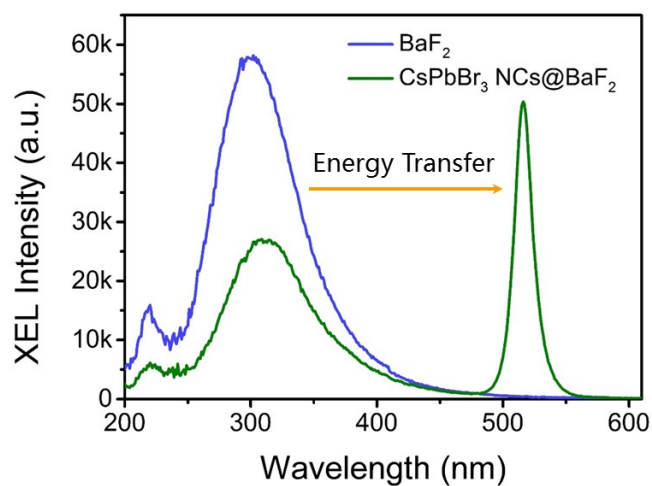

**Fig.S7** The XEL spectra of BaF<sub>2</sub> single crystal and CsPbBr<sub>3</sub> NCs@BaF<sub>2</sub>.

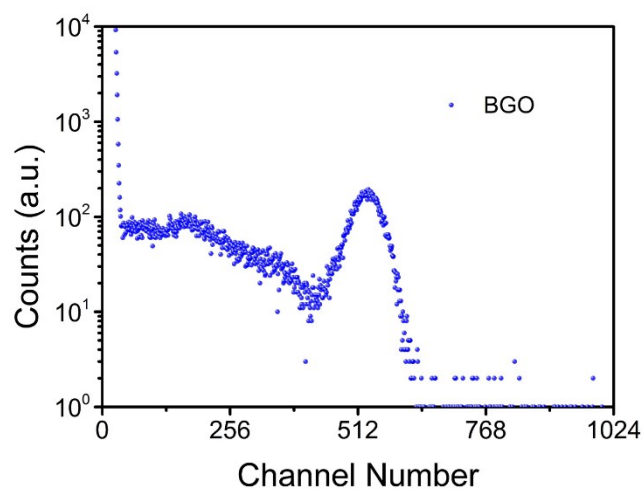

**Fig. S8**  $\gamma$ -ray pulse height spectra of standard commercial BGO single crystal scintillators whose light yield is 8000 photons/MeV.

**Table S1** PL Lifetime of CsPbX<sub>3</sub>(X=Cl, Br and I) nanocrystals

| Perovskite               | $\tau_1$ (ns) | A <sub>1</sub> (%) | $\tau_2$ (ns) | A <sub>2</sub> (%) | $\tau_{ave}$ (ns) |
|--------------------------|---------------|--------------------|---------------|--------------------|-------------------|
| CsPbCl <sub>3</sub>      | 2.0306        | 55.67              | 14.5866       | 44.33              | 7.596675          |
| CsPb(Cl/Br) <sub>3</sub> | 3.9288        | 41.27              | 17.8659       | 58.73              | 12.11406          |
| CsPbBr <sub>3</sub>      | 7.8258        | 61.24              | 27.2447       | 38.76              | 15.35257          |
| CsPb(Br/I) <sub>3</sub>  | 12.651        | 33.5               | 37.3357       | 66.5               | 29.06633          |
| CsPbI <sub>3</sub>       | 13.5825       | 22.05              | 45.8836       | 77.95              | 38.76121          |

**Table S2** PL Lifetime of CsPbBr<sub>3</sub> nanocrystals at different temperatures

| Temperature(K) | $\tau_1$ (ns) | A <sub>1</sub> (%) | $\tau_2$ (ns) | A <sub>2</sub> (%) | $\tau_{ave}$ (ns) |
|----------------|---------------|--------------------|---------------|--------------------|-------------------|
| 80             | 3.1294        | 0.8153             | 23.6061       | 0.1847             | 4.128993          |
| 120            | 2.9121        | 0.8109             | 28.0385       | 0.1891             | 4.208029          |
| 160            | 4.0026        | 0.812              | 30.2848       | 0.188              | 5.339773          |
| 200            | 3.3651        | 0.7601             | 30.3924       | 0.2399             | 5.813495          |
| 240            | 5.4323        | 0.7433             | 33.9986       | 0.2567             | 8.476291          |
| 280            | 6.6853        | 0.6589             | 35.521        | 0.3411             | 12.7798           |
| 320            | 8.3396        | 0.5438             | 45.6409       | 0.4562             | 23.74754          |
